1 **Title:** “Theory, practice, and conservation in the age of genomics: the Galápagos giant tortoise  
2 as a case study”

3

4 **Authors:**

5 Stephen J Gaughran<sup>1\*</sup>, Maud C Quinzin<sup>1</sup>, Joshua M Miller<sup>1</sup>, Ryan C Garrick<sup>2</sup>, Danielle L  
6 Edwards<sup>3</sup>, Michael A Russello<sup>4</sup>, Nikos Poulakakis<sup>5,6</sup>, Claudio Ciofi<sup>7</sup>, Luciano B Beheregaray<sup>8</sup>,  
7 Adalgisa Caccone<sup>1\*</sup>

8 1. Department of Ecology and Evolutionary Biology, Yale University, 21 Sachem St. New Haven,  
9 Connecticut, 06520, United States of America

10 2. Department of Biology, University of Mississippi, Oxford, Mississippi, 38677, United States of  
11 America

12 3. Life and Environmental Sciences, University of California, Merced, 5200 N Lake Rd, Merced,  
13 California, 95343, United States of America

14 4. Department of Biology, University of British Columbia, Okanagan Campus, Kelowna, BC V1V  
15 1V7, Canada

16 5. Department of Biology, School of Sciences and Engineering, University of Crete, Vasilika Vouton,  
17 Gr-71300, Heraklio, Crete, Greece

18 6. Natural History Museum of Crete, School of Sciences and Engineering, University of Crete,  
19 Knossos Av., GR-71409, Heraklio, Crete, Greece

20 7. Department of Biology, University of Florence, 50019 Sesto Fiorentino (FI), Italy

21 8. Molecular Ecology Lab, School of Biological Sciences, Flinders University, GPO Box 2100,  
22 Adelaide, SA, 5001, Australia

23

24 \*Corresponding authors: [stephen.gaughran@yale.edu](mailto:stephen.gaughran@yale.edu); [adalgisa.caccone@yale.edu](mailto:adalgisa.caccone@yale.edu)

25

26

27 **Abstract:**

28 High-throughput DNA sequencing allows efficient discovery of thousands of single nucleotide  
29 polymorphisms (SNPs) in non-model species. Population genetic theory predicts that this large  
30 number of independent markers should provide detailed insights into population structure, even  
31 when only a few individuals are sampled. Still, sampling design can have a strong impact on  
32 such inferences. Here, we use simulations and empirical SNP data to investigate the impacts of  
33 sampling design on estimating genetic differentiation among populations that represent three  
34 species of Galápagos giant tortoises (*Chelonoidis* spp.). Though microsatellite and  
35 mitochondrial DNA analyses have supported the distinctiveness of these species, a recent study  
36 called into question how well these markers matched with data from genomic SNPs, thereby  
37 questioning decades of studies in non-model organisms. Using >20,000 genome-wide SNPs  
38 from 30 individuals from three Galápagos giant tortoise species, we find distinct structure that  
39 matches the relationships described by the traditional genetic markers. Furthermore, we confirm  
40 that accurate estimates of genetic differentiation in highly structured natural populations can be  
41 obtained using thousands of SNPs and 2-5 individuals, or hundreds of SNPs and 10 individuals,  
42 but only if the units of analysis are delineated in a way that is consistent with evolutionary  
43 history. We show that the lack of structure in the recent SNP-based study was likely due to  
44 unnatural grouping of individuals and erroneous genotype filtering. Our study demonstrates that  
45 genomic data enable patterns of genetic differentiation among populations to be elucidated  
46 even with few samples per population, and underscores the importance of sampling  
47 design. These results have specific implications for studies of population structure in  
48 endangered species and subsequent management decisions.

49

50 *“Modern molecular techniques provide unprecedented power to understand genetic variation in*  
51 *natural populations. Nevertheless, application of this information requires sound understanding*  
52 *of population genetics theory.”*

53 *- Fred Allendorf (2017, p. 420)*

54

## 55 **Introduction:**

56 The advent of high-throughput DNA sequencing has enabled the characterization of the  
57 genomes of model and non-model organisms alike. Genome-wide data can improve the  
58 precision and accuracy of estimates of population parameters, enhancing our understanding of  
59 present-day structure, gene flow, and local adaptation (Funk *et al.* 2012). These data have also  
60 facilitated more detailed reconstructions of historical events that impacted evolutionary  
61 trajectories within species (e.g., Emerson *et al.* 2010), and among closely related species (e.g.,  
62 Chaves *et al.* 2016).

63 While whole genome sequencing is still beyond the budget of many research programs,  
64 methods based on reduced representation genomic libraries (e.g., double digest Restriction-site  
65 Associated DNA sequencing, ddRADseq (Peterson *et al.* 2012)) allow tens or hundreds of  
66 thousands of single nucleotide polymorphisms (SNPs) to be discovered and reliably genotyped  
67 at a much-reduced cost (Andrews *et al.* 2016). This is particularly beneficial for species of  
68 conservation concern, where limited resources and sampling constraints (i.e., few individuals  
69 are available) may be prevalent. No matter the application, though, well-designed population  
70 genetics studies aim to maximize their statistical power while minimizing costs.

71 Genome-wide SNP data are currently being applied to a broad spectrum of conservation  
72 objectives. These range from informing captive breeding programs (e.g., Wright *et al.* 2015) and  
73 improving detection of hybridization and inbreeding depression (e.g., Robinson *et al.* 2016;  
74 vonHoldt *et al.* 2016b), to delineating conservation units, assessing levels of adaptive genetic

75 variation, and predicting viability in the face of anthropogenic impacts such as climate change  
76 (Henry & Russello 2013; Rellstab *et al.* 2015; Sork *et al.* 2016; Brauer *et al.* 2016). The appeal  
77 of genomic approaches to conservation biology is heightened by indications that a large number  
78 of independent loci can alleviate issues associated with small sample sizes per population;  
79 when using thousands of loci one can obtain reliable estimates of genetic diversity and  
80 population differentiation, so long as the true values of these parameters are sufficiently high  
81 (e.g., Li and Durbin 2011; Willing *et al.* 2012). Yet, as noted by Allendorf (2017), genomic  
82 datasets need to be analyzed within the context of a carefully considered sampling design.  
83 Shortcomings in sampling design can lead to erroneous conclusions (Meirmans 2015), which  
84 can have profound consequences for any population level study, but especially for those with  
85 direct management implications for threatened or endangered species.

86         Here, we explore the power of using thousands of SNP markers to study population  
87 structure, and the impact of sampling design and small sample sizes on detecting and  
88 describing that structure. To do this, we use genomic data from Galápagos giant tortoises  
89 (*Chelonoidis* spp.) as a case study, given a recent study has questioned the genomic  
90 distinctiveness of several species within this genus (Loire *et al.* 2013). The Galápagos Islands  
91 are home to a radiation of endemic giant tortoises that includes 11 endangered and 4 extinct  
92 species (Fig. 1). Taxonomic designations are supported by differences in morphology,  
93 geographic isolation of most species, and evidence of evolutionary divergence based on  
94 mitochondrial DNA (mtDNA) and nuclear microsatellite data ((Ciofi *et al.* 2002; Beheregaray *et*  
95 *al.* 2003a; Garrick *et al.* 2015); see Fig. S7 A and B).

96         In contrast to previous studies (see supplementary material section VIII for details; Ciofi  
97 *et al.* 2002; Beheregaray *et al.* 2003a; Beheregaray *et al.* 2004; Russello *et al.* 2005; Poulakakis  
98 *et al.* 2012; Garrick *et al.* 2015; Poulakakis *et al.* 2015), Loire *et al.* (2013) challenged the  
99 genetic distinctiveness of three Galápagos giant tortoise species. Those authors collected

100 transcriptome-derived genotypic data from ~1000 synonymous SNPs from five captive  
101 individuals representing three species (*C. becki*, *C. porteri* and *C. vandenburghi*). They did not  
102 detect significant differentiation, as measured by  $F_{ST}$ , when comparing two groups (one group of  
103 three *C. becki* individuals, and the second group consisting of two individuals, one *C. porteri* and  
104 one *C. vandenburghi*). These two groups were constructed on what the authors identified as  
105 natural partitions, based on the observation that their samples fall into two different mtDNA  
106 clades (Fig. S6a; Poulakakis et al. 2012). Furthermore, Loire et al. (2013) did not detect  
107 homozygosity excess, as measured by  $F_{IT}$ , for which positive values would indicate population  
108 structure. Given that previous population genetic studies have largely relied upon data from  
109 mtDNA and microsatellites, such a discrepancy between these traditional markers and genomic  
110 SNPs could have wide-ranging implications, beyond the case of Galápagos giant tortoises, and  
111 therefore warrants further investigation.

112 In this study, we investigate the agreement of population structure analyses based on  
113 genome-wide SNPs compared to those based on mtDNA sequences and microsatellite  
114 genotypes. To do this we generated a dataset of tens of thousands of genome-wide SNPs from  
115 30 individuals representing the same three species (*C. becki*, *C. porteri*, and *C. vandenburghi*)  
116 considered by Loire et al. (2013). Since these species form a recently diverged species complex,  
117 we treat each species as a population to compare against the null hypothesis that all Galápagos  
118 giant tortoises belong to a single species with one panmictic population. First, we address  
119 whether or not there is significant genomic differentiation among these three Galápagos giant  
120 tortoise species using newly generated SNPs. Then, we subsample our data to explore the  
121 effects of using only a few individuals per population and of pooling individuals from different  
122 populations on estimating genetic differentiation. From these subsampling simulations, we  
123 predict the range of  $F_{ST}$  estimates expected when using the sampling scheme of Loire et al.

124 (2013). Finally, we reanalyze the raw RNA-seq data from Loire et al. (2013) to test our  
125 prediction.

126

127

## 128 **Materials and Methods:**

### 129 Sampling and sequencing

130 Samples were obtained during previously conducted collection expeditions (Caccone et  
131 al. 1999; Caccone et al. 2002; Ciofi et al. 2002; Beheregaray et al. 2003a; Beheregaray et al.  
132 2003b; Beheregaray et al. 2004; Russello et al. 2005; Ciofi et al. 2006; Russello et al. 2007;  
133 Poulakakis et al. 2008; Garrick et al. 2012; Poulakakis et al. 2012; Edwards et al. 2013;  
134 Edwards et al. 2014; Garrick et al. 2014). Approximately ten samples per population for each  
135 extant species ( $n=121$  individuals in total) were selected for sequencing as part of a larger  
136 project on the phylogeography of Galápagos giant tortoises. These individuals were chosen as  
137 they displayed concordant and unambiguous genetic assignments between mitochondrial  
138 (control region, mtCR) and microsatellite (12 loci) ancestry based on a published database of  
139 123 mitochondrial haplotypes (Poulakakis *et al.* 2012) and 305 genotyped individuals (Edwards  
140 *et al.* 2013) that include all the extant and extinct populations and species.

141 DNA was extracted from blood samples using a DNeasy Blood and Tissue kit (Qiagen)  
142 according to the manufacturer's instructions. We then prepared ddRAD libraries following  
143 Peterson et al. (2012). For each sample, 500 ng of genomic DNA was digested with the  
144 restriction enzymes *MluCI* and *NlaIII* (New England BioLabs), and ligated with Illumina-specific  
145 adaptors representing up to 18 unique barcodes and 2 index codes. Ligated fragments of  
146 samples were pooled into 13 libraries and size-selected to be ~310 bp (range 279 – 341bp) with  
147 a BluePippin (Sage Science). Size-selected libraries included 12 to 24 individuals and were

148 paired-end sequenced on 13 lanes of an Illumina HiSeq 2000 at the Yale Center for Genome  
149 Analysis.

150

#### 151 SNP calling

152 We used forward and reverse reads to generate a *de novo* assembly using the pyrad v.3.0.3  
153 pipeline (Eaton 2014). Reads were de-multiplexed and assigned to each individual based on  
154 barcodes allowing for one mismatch. We replaced base calls of  $Q < 20$  with an ambiguous base  
155 (N) and discarded sequences containing more than four ambiguities. We used 85% clustering  
156 similarity as a threshold to align the reads into loci. We set additional filtering parameters to  
157 allow for a maximum number of SNPs to be called: retaining clusters with a minimum depth of  
158 sequence coverage (Mindepth)  $> 5$  and a locus coverage (MinCov)  $> 10$ , a maximum proportion  
159 of individuals with shared heterozygote sites of 20% (MaxSH = p.20), and a maximum number  
160 of SNP per locus of 15 (maxSNP = 15). For subsequent analyses, we filtered this dataset using  
161 vcfTools (Danecek *et al.* 2011) to generate a set of polymorphic loci (23,057 SNPs) with no  
162 missing data common to all three Galápagos giant tortoises populations of interest, abbreviated  
163 PBL, CRU, and VA and corresponding to the species *C. becki*, *C. porteri*, and *C. vandenburghi*,  
164 respectively ( $n = 10$  individuals each).

165

#### 166 Analytical methods

167  $F$ -statistics ( $F_{IT}$ ,  $F_{IS}$ , global  $F_{ST}$ , and pairwise  $F_{ST}$ ) were calculated using the diveRsity  
168 package in R (Keenan *et al.* 2013), which uses a weighted Weir and Cockerham (1984)  
169 estimator. The same package was used to assess the statistical significance of these estimates  
170 by bootstrapping across loci. Through this method we established 95% confidence intervals for  
171 each estimate, accepting as significant those that did not include 0. Pairwise  $F_{ST}$  calculated from  
172 thousands of subsamples of the data (described below) were carried out in vcfTools (Danecek *et*

173 *al.* 2011) to streamline computation. We also used vcfTools to calculate the number of loci out of  
174 Hardy-Weinberg equilibrium for each population and for pooled populations.

175 Since  $F_{ST}$  estimates rely on *a priori* assignment of individuals to groups that are typically  
176 based on geographic location, we used two methods that do not have this assumption to assess  
177 patterns of differentiation among our samples. To do this, we first carried out Principal  
178 Component Analysis (PCA) on all 30 individuals, using the PLINK software (Chang *et al.* 2015).  
179 Principal components 1 and 2 were plotted against each other in R. To complement the  
180 multivariate analyses, we performed a Bayesian clustering analysis, implemented in the  
181 program STRUCTURE version 2.3.4 (Pritchard *et al.* 2000; Falush *et al.* 2003), also including all  
182 30 individuals. STRUCTURE assumes a model with K unknown clusters representing genetic  
183 populations in Hardy-Weinberg equilibrium, and then assigns individuals to each cluster based  
184 on allele frequencies. We ran 20 repetitions of STRUCTURE for K=1–5, with a burn-in of 10,000  
185 iterations and MCMC length of 50,000 iterations. These runs used the admixture model,  
186 correlated allele frequencies among populations, and did not assume prior population  
187 information. All other parameters were left at default values. Results were post-processed and  
188 visualized using CLUMPAK (Kopelman *et al.* 2015). We used mean log likelihood values  
189 (Pritchard *et al.* 2000) and the  $\Delta K$  statistic (Evanno *et al.* 2005) to infer the best K  
190 (Supplementary Figure S5). Both analyses considered the 23,057 SNPs common to all  
191 individuals.

192 To further assess the power of our SNPs to detect population structure, we randomly  
193 subsampled individuals from each of the species and calculated pairwise  $F_{ST}$  for each species  
194 using these subsamples. We tested this for per-species sample sizes of  $n=2$ ,  $n=3$ , and  $n=5$ .  
195 This process was repeated 1,000 times for each sample size. We also carried out a similar  
196 analysis maintaining all 10 individuals per population but randomly subsampling SNPs from our  
197 dataset. For these analyses we used the following number of SNPs: 25, 50, 100, 200, 500, 1000,



198 5000, and 10,000. This was repeated 1,000 times for each sample size. Finally, we used a  
199 subsampling scenario that directly mimicked the one in Loire *et al.* (2013) to further evaluate the  
200 impact of limited sample sizes and pooling of samples from distinct species on  $F_{ST}$  estimates.  
201 As was done in Loire *et al.* (2013), we compared a set of three individuals from *C. becki* to a  
202 grouping that included one *C. porteri* plus one *C. vandenburghi* individual. To account for  
203 sample variation, we repeated this grouping process 1,000 times (described in full in  
204 supplementary material section IV).

205

## 206 **Results:**

### 207 Tortoise samples and ddRAD-seq dataset

208 Our sequencing generated a total of 3,094,399,092 retained reads (approximately 15 to  
209 58 million reads per individual) after de-multiplexing and filtering reads for quality and  
210 ambiguous barcodes and ddRAD-tags. *de novo* assembly of the data resulted in 48,004,056  
211 ddRAD-tags (approximately 320,000-465,000 per individual). From these, we called SNPs and  
212 obtained 973,321 variable sites. We then narrowed those loci down to only loci with genotypes  
213 called in every individual in our three species data set, for a total of 23,057 SNPs. For the three  
214 species of interest the number of loci retained within populations and between populations pairs  
215 are presented in Table 1. The average coverage per locus per individual was 12X (minimum 9;  
216 maximum 15).

217

### 218 F-statistics using ddRAD-seq data

219 Calculation of *F*-statistics revealed values consistent with highly-structured populations  
220 ( $F_{IT} = 0.257$ , 95% CI: 0.251 – 0.262;  $F_{IS} = 0.079$ , 95% CI: 0.073 – 0.084; and global  $F_{ST} = 0.193$ ,  
221 95% CI: 0.189 – 0.198). Using the SNPs in common to each population pair (Table 1), we found  
222 pairwise  $F_{ST}$  values of 0.169 (95% CI: 0.164 – 0.174) between PBL and CRU, 0.181 (95% CI:

223 0.175 – 0.187) between PBL and VA, and 0.233 (95% CI: 0.226 – 0.240) between CRU and VA  
224 (Table 2). These estimates were similar to, though higher than,  $F_{ST}$  estimates using 12 nuclear  
225 microsatellite markers (Garrick *et al.* 2015) for these species comparisons (Table 2 and  
226 supplementary materials Table S5).

227

## 228 PCA and STRUCTURE

229 The first two principal components of the PCA showed clear differentiation among  
230 individuals from the three species. PC1 accounted for approximately 12.0% of the variation  
231 among individuals and PC2 accounted for approximately 9.3% of the variation among  
232 individuals (Figure 2). Similarly, both mean log likelihood values (Pritchard *et al.* 2000) and the  
233  $\Delta K$  statistic (Evanno *et al.* 2005) supported the existence of three distinct genetic units in the  
234 STRUCTURE analysis (Supplementary Figure S5). These groups correspond to the *a priori*  
235 geographic groupings used in  $F_{ST}$  estimates and to the three named species. Our separate  
236 analysis of loci out of Hardy-Weinberg equilibrium (HWE), the basis for the STRUCTURE  
237 algorithm, supported these findings as well. When each species was considered separately, out  
238 of 23,057 loci PBL showed 214 out of HWE, CRU showed 124 out of HWE, and VA showed 71  
239 out of HWE. When the CRU and VA samples were pooled, the number of loci out of HWE rose  
240 to 1326. When all three species were pooled and treated as one population, 2422 loci were  
241 found to be out of HWE.

242

## 243 Sample size, number of loci, and the effect of individual samples

244 In all population comparisons for the three sample sizes ( $n = 2, 3, \text{ or } 5$ ), the majority of  
245 estimates were within 0.03 of the  $F_{ST}$  value calculated using the complete dataset of 10 samples  
246 per population (Figure 3). In every case, when the sample size was two  $F_{ST}$  tended to be  
247 underestimated, though with a long tail of overestimated outliers. In all comparisons with sample

248 sizes of three or five this skew disappeared: we found that 95% of the estimates were within  
249 0.05 of the estimate using 10 samples (Supplementary Tables S1).

250 Our  $F_{ST}$  estimates from subsampled SNPs ranging from 25 to 10,000 SNPs appeared to  
251 have the statistical power to detect population structure between these population pairs when  
252 10 individuals were used, with 95% of all estimates above 0 (Table S2 A – C). However, as  
253 expected, with many fewer SNPs the range of 95% of the estimates was very wide (see  
254 supplementary material section III). For example, when only 100 SNPs were used to compare  
255 PBL and CRU, 95% of the  $F_{ST}$  estimates were between 0.1 and 0.255, while using 1000 SNPs  
256 gave 95% of the  $F_{ST}$  estimates between 0.146 and 0.194 for the same comparison (Table S2A).

257

#### 258 Effect of pooling samples

259 To test how pooling samples affected F-statistic estimates, we used the Loire *et al.*  
260 (2013) sampling design, pooling one individual from *C. porteri* and one individual from *C.*  
261 *vandenburghi* into one population and comparing this to three individuals from *C. becki*. When  
262 the set of common SNPs ( $n=23,057$ ) were included in the analysis, the  $F_{ST}$  estimates between  
263 1000 pairs of these groups ranged from 0.045 to 0.136 (95%: 0.052–0.127, mean: 0.075). When  
264 only 1,000 SNP loci were used, as in Loire *et al.* (2013), the  $F_{ST}$  estimates ranged from 0.006 to  
265 0.157 (95%: 0.031–0.134, mean: 0.076) (see Supplementary Figures S4A and S4B). This  
266 confirms that pooling samples from two populations, each representing different species, results  
267 in a strongly depressed  $F_{ST}$  estimate. However, these simulations highlight that the occurrence  
268 of genetic differentiation (i.e., positive  $F_{ST}$  values) should still be detectable even with this  
269 grouping scheme.

270

#### 271 Re-analysis of Loire et al. transcriptome data

272           Given that our analyses of ddRAD-seq data showed clear genetic structure among the  
273 populations from the three species, and our subsampling simulations (Figure S4) predicted that  
274 positive  $F_{ST}$  values should still be detectable using the grouping scheme adopted by Loire et al.  
275 (2013), we reanalyzed the original RNA-seq data generated for that publication to further assess  
276 the source of the discrepancy. We downloaded the publically-available RNA sequencing data  
277 generated by Loire et al. (2013) from the NCBI's Sequence Read Archive and re-called SNPs  
278 after aligning these reads to a draft genome assembly of a closely related species of Galápagos  
279 giant tortoise, *C. abingdonii* (unpublished data; see methods in supplementary materials section  
280 VII). With these transcriptome-derived SNP data, we estimated an  $F_{ST}$  of 0.054 (95% CI: 0.049  
281 – 0.058) when comparing the three *C. becki* samples (PBL) to the combined two *C. porteri* and  
282 *C. vandenburghi* samples (CRU and VA). Notably, this  $F_{ST}$  value falls within our predicted range  
283 of  $F_{ST}$  estimates generated by subsampling the ddRAD-seq data. Our  $F_{IT}$  estimate for this data  
284 set was -0.121 (95% CI: -0.129 – -0.113), with  $F_{IS}$  estimated to be -0.185 (95% CI: -0.192 –  
285 0.177).

286           Plotting the first two principal components of a PCA of these five samples showed clear  
287 clustering of the conspecific samples from *C. becki*, while the single samples from *C.*  
288 *vandenburghi* (VA) and *C. porteri* (CRU) are distinct from each other and from the *C. becki*  
289 samples (supplementary Figure S6).

290

## 291 **Discussion**

### 292 Strong evidence of population structure

293           Using genome-wide SNP data we found evidence for significant differentiation among  
294 the three species considered (*C. becki*, *C. porteri*, and *C. vandenburghi*), consistent with the  
295 findings of decades of research in this system (Ciofi et al. 2002; Beheregaray et al. 2003a;  
296 Beheregaray et al. 2003b; Beheregaray et al. 2004; Russello et al. 2005; Russello et al. 2007;

297 Poulakakis et al. 2008; Poulakakis et al. 2012; Garrick et al. 2015; Poulakakis et al. 2015). Our  
298 estimate of  $F_{IT}$  (0.257), which was a focal metric used in the previous study (Loire *et al.* 2013),  
299 was positive and significantly different from zero. Positive values of  $F_{IT}$  indicate an excess of  
300 homozygous loci in the sample set. This could suggest the existence of population structure in  
301 the total sample set. This possibility is reinforced by the finding of very high and  
302 significantly different from zero  $F_{ST}$  estimates for the same comparisons (between 0.17  
303 and 0.24; Table 2, supplementary Figure S1). Interpreting significantly positive  $F_{IS}$  values,  
304 such as the one calculated from our ddRAD-seq data set, can be difficult (Allendorf and Luikart  
305 2007). This could be due to substructure within one or more populations, sampling stochasticity,  
306 and/or recent demographic changes in relatively small populations. It could also be that such  
307 small populations are not necessarily expected to be in Hardy-Weinberg equilibrium due to the  
308 increased influence of genetic drift (Allendorf & Luikart 2009).

309 To assess whether there was additional genetic structure outside of our *a priori*  
310 assignment of individuals based on their geographic location, we also analyzed the 30 samples  
311 in our ddRAD-seq data set using two methods without prior assignment of each sample to a  
312 group. Both principal component (Figure 2) and Bayesian clustering analyses (supplementary  
313 Figure S5) clearly discerned three genetically distinct clusters that corresponded to the samples  
314 from the three species tested in our pairwise  $F_{ST}$  estimates. This echoed our per-locus analysis  
315 of Hardy-Weinberg equilibrium (HWE), which showed that treating all 30 individuals from the  
316 three named species as a single population dramatically increased the number of loci out of  
317 HWE.

318 Results of our analyses of population structure using tens of thousands of genome-wide  
319 SNPs are concordant with earlier studies using mtDNA haplotypes and microsatellite genotypes  
320 (Ciofi et al. 2002; Beheregaray et al. 2003a; Beheregaray et al. 2003b; Beheregaray et al. 2004;

321 Russello et al. 2005; Russello et al. 2007; Poulakakis et al. 2008; Poulakakis et al. 2012;  
322 Garrick et al. 2015; Poulakakis et al. 2015). These findings definitively resolve concerns raised  
323 by Loire et al. (2013) regarding whether these traditional markers were accurately reflecting the  
324 genetic distinctiveness of Galápagos giant tortoise species. Importantly, our results not only  
325 revealed the same genetic clustering as earlier studies, but also showed the same patterns of  
326 genetic distance. As in the microsatellite studies, we found slightly greater genetic differentiation  
327 between *C. becki* and *C. vandenburghi* (PBL and VA:  $F_{ST} = 0.181$ ) than between *C. becki* and *C.*  
328 *porteri* (PBL and CRU:  $F_{ST} = 0.169$ ), and the greatest differentiation between *C. porteri* and *C.*  
329 *vandenburghi* (CRU and VA:  $F_{ST} = 0.233$ ) (Table 2). While qualitatively the same, our  $F_{ST}$   
330 estimates are notably higher than those calculated using microsatellites (Table 2), a finding  
331 predicted by the mathematics of using biallelic vs. multiallelic loci (Putman & Carbone 2014),  
332 which has also been found in other systems (e.g., Payseur and Jing 2009).

333

#### 334 Impact of sample size and number of loci on detecting population structure

335 Population genetic theory (Nei 1978), simulations (Willing *et al.* 2012), and empirical  
336 work (Reich *et al.* 2009) support the idea that a data set of thousands of loci should have the  
337 power to detect population structure with high precision, even when only a few individuals per  
338 population are analyzed. We tested this idea with our Galápagos giant tortoise ddRAD-seq SNP  
339 data by estimating  $F_{ST}$  from subsamples of two, three, and five individuals from each population  
340 and comparing them to the same estimates obtained from 10 individuals per population. All  
341 tested sample sizes were able to detect significant  $F_{ST}$  values, though using three or five  
342 samples yielded more precise estimates than using only two (Figure 3; supplementary tables  
343 S1). These analyses are consistent with the idea that accurate  $F_{ST}$  values can be estimated  
344 using as few as two or three samples per population if thousands of SNPs are analyzed.  
345 Likewise, we found that for highly differentiated populations such as those studied here,

346 hundreds of SNPs were sufficient to accurately describe population structure when ten  
347 individuals per population were used. This empirical evidence should be helpful in the design of  
348 future conservation genetics studies that aim to describe population structure, in which case  
349 additional samples may lead to diminishing returns for improving statistical power. This will be  
350 especially useful for endangered or elusive species for which sampling may present a severe  
351 limitation.

352

### 353 Sampling design matters

354 Our genome-wide SNP data detected high and significant differentiation among these  
355 three species, even when only two or three individuals from each were used in the analysis  
356 (Figure 3). While these results were strongly supported, they failed to explain the discrepancy  
357 described by Loire et al. (2013), who used over 1,000 synonymous SNPs from transcriptome  
358 sequencing data and found no differentiation between the same three species. Their sample  
359 size of five captive individuals does not by itself account for the discrepancy between the two  
360 studies, because, as we show above (supplementary Figure S4), using thousands of SNPs  
361 should give sufficient power to detect population structure in Galápagos giant tortoises, even  
362 when sample size is that small.

363 Instead, sampling design, and specifically grouping of individuals into inappropriate  
364 population units, rather than sample size likely biased the statistical power of Loire et al.'s  
365 (2013) study. Their sampling scheme divided the five individuals into two groups, which did not  
366 reflect the population divergence of the three species. Specifically, this mixed group included  
367 two individuals, each from different species (CRU, *C. porteri* from Santa Cruz Island; VA, *C.*  
368 *vandenburghi* from central Isabela Island), and another group of three individuals from the other  
369 species (PBL, *C. becki* from northern Isabela Island). The justification for this grouping was  
370 based on the closer phylogenetic relationship of mtDNA haplotypes from *C. porteri* and *C.*

371 *vandenburghi* (Caccone et al. 1999; Russello et al. 2007) compared to haplotypes found in the  
372 PBL *C. becki* population. This choice is problematic for several reasons (detailed in the  
373 supplementary material section VIII). Most importantly,  $F$ -statistics are a reflection of population  
374 differentiation, not of phylogenetic relatedness. Treating the individuals from *C. porteri* and *C.*  
375 *vandenburghi* as belonging to the same population biased the  $F$ -statistics estimates by leading  
376 to an increase in within-group variation, and therefore depressed  $F_{ST}$  values. This within-group  
377 structure, which distorts  $F$ -statistics, is known as Wahlund effect (Wahlund 1928).

378         The problem outlined above is clear in our pairwise analysis using >20,000 SNPs, which  
379 shows that while the *C. becki* population sample is about equally differentiated from the *C.*  
380 *porteri* and *C. vandenburghi* ones, the ones from *C. porteri* and *C. vandenburghi* are more  
381 differentiated from each other than from the *C. becki* population sample (Table 2). To empirically  
382 test for the Wahlund effect under this sampling scheme, we simulated a scenario in which three  
383 samples from *C. becki* were compared to a population consisting of one *C. porteri* and one *C.*  
384 *vandenburghi* sample. Repeating this sampling scenario 1,000 times, we found significantly  
385 depressed mean  $F_{ST}$  estimates, as low as 0.075, with 95% of comparisons ranging from 0.052  
386 to 0.127 (supplementary Figure S4A). Even more strikingly, when we limited the analysis to a  
387 similar number of markers as Loire et al. (2013) and used 1,000 randomly drawn SNPs, the  
388 range of 95% of the estimates increased to 0.031 to 0.134.

389

#### 390 RNA-seq data supports population structure

391         While our subsampling simulations showed a clear Wahlund effect when samples from  
392 two different species (*C. porteri* and *C. vandenburghi*) were combined into one grouping, these  
393  $F_{ST}$  estimates were still positive (mean  $F_{ST} = 0.075$ ). We therefore would have expected Loire et  
394 al. (2013) to find a similar estimate in their analysis of RNA-seq data, but they reported no  
395 significantly positive  $F_{ST}$  value. To investigate this discrepancy, we re-analyzed their raw



396 sequencing data by aligning it to a Galápagos giant tortoise reference genome. Using the SNPs  
397 from this reanalysis, we estimated an  $F_{ST}$  of 0.054, which is similar to our expected  $F_{ST}$  under  
398 their sampling design (supplementary Figure S4). Our estimates of  $F_{IS}$  and  $F_{IT}$  for the RNA-seq  
399 data set were negative, a surprising result that may be related to the sampling design, the  
400 specific individuals included in that study, or the deviations from Hardy-Weinberg equilibrium  
401 that can occur in small populations (Kimura & Crow 1963). This last point is due to the  
402 assumption of large numbers in Hardy-Weinberg equilibrium, which is violated in small  
403 populations (Allendorf & Luikart 2009).

404 Convincingly, a PCA of Loire et al.'s (2013) SNP data revealed a tight cluster of the three  
405 PBL samples, whereas the CRU and VA samples were distinct both from the PBL cluster and  
406 from each other (Figure S6). This pattern of principal components mirrors the one that we found  
407 with our 30 sample dataset for the same populations (Figure 2). These results, which match our  
408 expectations based on subsampling simulations (Supplementary figure S4), suggest that the  
409 lack of significantly positive  $F_{ST}$  values found by Loire et al. (2013) is due not just to small  
410 sample size and inappropriate grouping of samples, but also the genotype filters employed in  
411 their initial analysis. The original Loire et al. (2013) methods describe a genotype filter that  
412 assigns posterior probability to genotypes based on Hardy-Weinberg equilibrium. We suspect  
413 that this may not be a reliable method when genotyping a pool of individuals from different  
414 species, since these samples will not meet the assumption of Hardy-Weinberg equilibrium. Our  
415 SNP calls of their data may have also been improved by mapping the RNA sequence reads to a  
416 draft Galápagos giant tortoise reference genome, as suggested by others (Shafer *et al.* 2016).  
417 However, our ddRAD-seq SNP data were called without mapping to a reference, so this  
418 methodological difference cannot completely explain the loss of signal.

419

420 Conclusions

421           Reduced-representation sequencing offers practical ways to take advantage of the  
422 power of population genomics, even when samples and funds are limited (Narum *et al.* 2013).  
423 Yet, thoughtful study design remains an essential component. Our analyses clearly showed that  
424 tortoises representing each of three named species exhibit high genetic differentiation at the  
425 genomic level, as demonstrated through high and significant  $F_{ST}$ , and positive  $F_{IT}$  estimates, as  
426 well as through principal component and Bayesian clustering analyses. Using thousands of  
427 SNPs gives high statistical power to detect population structure even when sample sizes of  
428 individuals are as few as two or three individuals. However, the heterogeneity of samples within  
429 a population can confound calculations using small sample sizes in unpredictable ways.  
430 Reduced sample size also limits the diversity of analyses that can be performed, especially  
431 limiting those that do not rely on a priori population designation, such as principal component  
432 analysis and Bayesian clustering algorithms. Ultimately, we found that both our ddRAD-seq data  
433 and a reanalysis of RNA-seq data generated by Loire *et al.* (2013) were consistent with the  
434 findings of earlier microsatellite and mtDNA studies. We therefore expect genome-wide SNPs to  
435 support the conclusions of population genetic studies of Galápagos giant tortoises beyond the  
436 three species considered here.

437           Distinguishing populations and evolutionary lineages, such as the giant tortoise species  
438 analyzed here, is a vital role for population genetic analyses to play in conservation (Funk *et al.*  
439 2012). Results from such analyses can assist in protected area designation (Larson *et al.* 2014),  
440 inform appropriate legal protections (vonHoldt *et al.* 2016a), and guide captive breeding  
441 strategies (de Cara *et al.* 2011; Lew *et al.* 2015). We show that, as long as population genetics  
442 theory is carefully taken into account, the use of genome-wide data enabled by high-throughput  
443 sequencing can be a powerful tool in these conservation efforts, even when sample sizes are  
444 limited.

445

446 **Data Accessibility:** Raw data from Illumina sequencing will be deposited to the NCBI Short  
447 Read Archive (SRA) for all individuals included in this study. The vcf file used in the analyses  
448 will be deposited on Dryad. Microsatellite genotypes and mitochondrial DNA sequences used in  
449 the supplementary material are available upon request.

450

451 **Literature Cited:**

- 452 Allendorf FW (2017) Genetics and the conservation of natural populations: allozymes to  
453 genomes. *Molecular Ecology*, **26**, 420–430.
- 454 Allendorf FW, Luikart G (2009) *Conservation and the genetics of populations*. Blackwell  
455 Publishing Inc.
- 456 Andrews KR, Good JM, Miller MR, Luikart G, Hohenlohe PA (2016) Harnessing the power of  
457 RADseq for ecological and evolutionary genomics. *Nat Rev Genet*, **17**, 81–92.
- 458 Beheregaray LB, Ciofi C, Caccone A, Gibbs JP, Powell JR (2003a) Genetic divergence,  
459 phylogeography and conservation units of giant tortoises from Santa Cruz and Pinzon,  
460 Galapagos Islands. *Conservation Genetics*, **4**, 31–46.
- 461 Beheregaray LB, Ciofi C, Geist D *et al.* (2003b) Genes record a prehistoric volcano eruption in  
462 the Galapagos. *Science*, **302**, 75.
- 463 Beheregaray LB, Gibbs JP, Havill N *et al.* (2004) Giant tortoises are not so slow: Rapid  
464 diversification and biogeographic consensus in the Galapagos. *Proceedings of the National  
465 Academy of Sciences of the United States of America*, **101**, 6514–6519.
- 466 Brauer CJ, Hammer MP, Beheregaray LB (2016) Riverscape genomics of a threatened fish  
467 across a hydroclimatically heterogeneous river basin. *Molecular Ecology*, **25**, 5093–5113.
- 468 Caccone A, Gentile G, Gibbs JP *et al.* (2002) Phylogeography and history of giant Galapagos  
469 tortoises. *Evolution*, **56**, 2052–2066.
- 470 Caccone A, Gibbs JP, Ketmaier V, Suatoni E, Powell JR (1999) Origin and evolutionary  
471 relationships of giant Galapagos tortoises. *Proceedings of the National Academy of  
472 Sciences of the United States of America*, **96**, 13223–13228.
- 473 de Cara MÁR, Fernández J, Toro MA, Villanueva B (2011) Using genome-wide information to  
474 minimize the loss of diversity in conservation programmes. *Journal of Animal Breeding and  
475 Genetics*, **128**, 456–464.
- 476 Chang C, Chow C, Tellier L *et al.* (2015) Second-generation PLINK: rising to the challenge of  
477 larger and richer datasets. *GigaScience*, **4**.
- 478 Chaves JA, Cooper EA, Hendry AP *et al.* (2016) Genomic variation at the tips of the adaptive  
479 radiation of Darwin’s finches. *Molecular Ecology*, **25**, 5282–5295.
- 480 Ciofi C, Milinkovitch MC, Gibbs JP, Caccone A, Powell JR (2002) Microsatellite analysis of  
481 genetic divergence among populations of giant Galapagos tortoises. *Molecular Ecology*, **11**,  
482 2265–2283.
- 483 Ciofi C, Wilson GA, Beheregaray LB *et al.* (2006) Phylogeographic history and gene flow among  
484 giant Galapagos tortoises on southern Isabela Island. *Genetics*, **172**, 1727–1744.
- 485 Danecek P, Auton A, Abecasis G *et al.* (2011) The variant call format and VCFtools.  
486 *Bioinformatics*, **27**, 2156–2158.
- 487 Eaton DAR (2014) PyRAD: assembly of de novo RADseq loci for phylogenetic analyses.  
488 *Bioinformatics*, **30**, 1844–1849.
- 489 Edwards DL, Benavides E, Garrick RC *et al.* (2013) The genetic legacy of Lonesome George

- 490 survives: Giant tortoises with Pinta Island ancestry identified in Galapagos. *Biological*  
491 *Conservation*, **157**, 225–228.
- 492 Edwards DL, Garrick RC, Tapia W, Caccone A (2014) Cryptic structure and niche divergence  
493 within threatened Galápagos giant tortoises from southern Isabela Island. *Conservation*  
494 *Genetics*, **15**, 1357–1369.
- 495 Emerson KJ, Merz CR, Catchen JM *et al.* (2010) Resolving postglacial phylogeography using  
496 high-throughput sequencing. *Proceedings of the National Academy of Sciences of the*  
497 *United States of America*, **107**, 16196–16200.
- 498 Evanno G, Regnaut S, Goudet J (2005) Detecting the number of clusters of individuals using  
499 the software structure: a simulation study. *Molecular Ecology*, **14**, 2611–2620.
- 500 Falush D, Stephens M, Pritchard JK (2003) Inference of population structure using multilocus  
501 genotype data: Linked loci and correlated allele frequencies. *Genetics*, **164**, 1567–1587.
- 502 Funk WC, McKay JK, Hohenlohe PA, Allendorf FW (2012) Harnessing genomics for delineating  
503 conservation units. *TREE*, **27**, 489–496.
- 504 Garrick RC, Benavides E, Russello MA *et al.* (2012) Genetic rediscovery of an “extinct”  
505 Galapagos giant tortoise species. *Current Biology*, **22**, R10–R11.
- 506 Garrick RC, Benavides E, Russello MA *et al.* (2014) Lineage fusion in Galapagos giant tortoises.  
507 *Molecular Ecology*, **23**, 5276–5290.
- 508 Garrick RC, Kajdacs B, Russello MA *et al.* (2015) Naturally rare versus newly rare:  
509 demographic inferences on two timescales inform conservation of Galápagos giant  
510 tortoises. *Ecology and Evolution*, **5**, 676–694.
- 511 Henry P, Russello MA (2013) Adaptive divergence along environmental gradients in a climate-  
512 change-sensitive mammal. *Ecology and Evolution*, **3**, 3906–3917.
- 513 Keenan K, McGinnity P, Cross TF, Crozier WW, Prodöhl PA (2013) diveRsity: An R package for  
514 the estimation and exploration of population genetics parameters and their associated  
515 errors. *Methods in Ecology and Evolution*, **4**, 782–788.
- 516 Kimura M, Crow JF (1963) The measurement of effective population number. *Evolution*, **17**,  
517 279–288.
- 518 Kopelman NM, Mayzel J, Jakobsson M, Rosenberg NA, Mayrose I (2015) Clumpak: a program  
519 for identifying clustering modes and packaging population structure inferences across K.  
520 *Molecular Ecology Resources*, **15**, 1179–1191.
- 521 Larson WA, Seeb LW, Everett M V *et al.* (2014) Genotyping by sequencing resolves shallow  
522 population structure to inform conservation of Chinook salmon (*Oncorhynchus*  
523 *tshawytscha*). *Evolutionary Applications*, **7**, 355–369.
- 524 Lew RM, Finger AJ, Baerwald MR *et al.* (2015) Using Next-Generation Sequencing to Assist a  
525 Conservation Hatchery: a Single-Nucleotide Polymorphism Panel for the Genetic  
526 Management of Endangered Delta Smelt. *Transactions of the American Fisheries Society*,  
527 **144**, 767–779.
- 528 Li H, Durbin R (2011) Inference of human population history from individual whole-genome  
529 sequences. *Nature*, **475**, 493–496.
- 530 Loire E, Chiari Y, Bernard A *et al.* (2013) Population genomics of the endangered giant  
531 Galapagos tortoise. *Genome Biology*, **14**.
- 532 Meirmans PG (2015) Seven common mistakes in population genetics and how to avoid them.  
533 *Molecular Ecology*, **24**, 3223–3231.
- 534 Narum SR, Buerkle CA, Davey JW, Miller MR, Hohenlohe PA (2013) Genotyping-by-  
535 sequencing in ecological and conservation genomics. *Molecular Ecology*, **22**, 2841–2847.
- 536 Nei M (1978) Estimation of average heterozygosity and genetic distance from a small number of  
537 individuals. *Genetics*, **89**, 583–590.
- 538 Payseur BA, Jing P (2009) A Genomewide Comparison of Population Structure at STRPs and

- 539 Nearby SNPs in Humans. *Molecular Biology and Evolution*, **26**, 1369–1377.
- 540 Peterson BK, Weber JN, Kay EH, Fisher HS, Hoekstra HE (2012) Double Digest RADseq: An  
541 Inexpensive Method for De Novo SNP Discovery and Genotyping in Model and Non-Model  
542 Species. *PLOS ONE*, **7**, e37135.
- 543 Poulakakis N, Edwards DL, Chiari Y *et al.* (2015) Description of a New Galapagos Giant  
544 Tortoise Species (Chelonoidis; Testudines: Testudinidae) from Cerro Fatal on Santa Cruz  
545 Island. *PLoS ONE*, **10**, e0138779.
- 546 Poulakakis N, Glaberman S, Russello M *et al.* (2008) Historical DNA analysis reveals living  
547 descendants of an extinct species of Galapagos tortoise. *Proceedings of the National  
548 Academy of Sciences of the United States of America*, **105**, 15464–15469.
- 549 Poulakakis N, Russello M, Geist D, Caccone A (2012) Unravelling the peculiarities of island life:  
550 vicariance, dispersal and the diversification of the extinct and extant giant Galapagos  
551 tortoises. *Molecular Ecology*, **21**, 160–173.
- 552 Pritchard JK, Stephens M, Donnelly P (2000) Inference of population structure using multilocus  
553 genotype data. *Genetics*, **155**, 945–959.
- 554 Putman AI, Carbone I (2014) Challenges in analysis and interpretation of microsatellite data for  
555 population genetic studies. *Ecology and Evolution*, **4**, 4399–4428.
- 556 Reich D, Thangaraj K, Patterson N, Price AL, Singh L (2009) Reconstructing Indian population  
557 history. *Nature*, **461**, 489–494.
- 558 Rellstab C, Gugerli F, Eckert AJ, Hancock AM, Holderegger R (2015) A practical guide to  
559 environmental association analysis in landscape genomics. *Molecular Ecology*, **24**, 4348–  
560 4370.
- 561 Robinson JA, Ortega-Del Vecchyo D, Fan Z *et al.* (2016) Genomic flatlining in the endangered  
562 island fox. *Current Biology*, **26**, 1183–1189.
- 563 Russello MA, Beheregaray LB, Gibbs JP *et al.* (2007a) Lonesome George is not alone among  
564 Galápagos tortoises. *Current Biology*, **17**, R317–R318.
- 565 Russello MA, Glaberman S, Gibbs JP *et al.* (2005) A cryptic taxon of Galapagos tortoise in  
566 conservation peril. *Biology Letters*, **1**, 287–290.
- 567 Russello MA, Hyseni C, Gibbs JP *et al.* (2007b) Lineage identification of Galapagos tortoises in  
568 captivity worldwide. *Animal Conservation*, **10**, 304–311.
- 569 Shafer ABA, Peart CR, Tusso S *et al.* (2016) Bioinformatic processing of RAD-seq data  
570 dramatically impacts downstream population genetic inference. *Methods in Ecology and  
571 Evolution*, n/a-n/a.
- 572 Sork VL, Squire K, Gugger PF *et al.* (2016) Landscape genomic analysis of candidate genes for  
573 climate adaptation in a California endemic oak, *Quercus lobata*. *American Journal of  
574 Botany*, **103**, 33–46.
- 575 vonHoldt BM, Cahill JA, Fan Z *et al.* (2016a) Whole-genome sequence analysis shows that two  
576 endemic species of North American wolf are admixtures of the coyote and gray wolf.  
577 *Science Advances*, **2**.
- 578 vonHoldt BM, Kays R, Pollinger JP, Wayne RK (2016b) Admixture mapping identifies  
579 introgressed genomic regions in North American canids. *Molecular Ecology*, **25**, 2443–  
580 2453.
- 581 Wahlund S (1928) Zusammensetzung von populationen und korrelationserscheinungen vom  
582 standpunkt der vererbungslehre aus betrachtet. *Hereditas*, **11**, 65–106.
- 583 Weir BS, Cocker (1984) Estimating F-Statistics for the Analysis of Population Structure.  
584 *Evolution*, **38**, 1358–1370.
- 585 Willing E-M, Dreyer C, van Oosterhout C (2012) Estimates of Genetic Differentiation Measured  
586 by FST Do Not Necessarily Require Large Sample Sizes When Using Many SNP Markers.  
587 *PLoS ONE*, **7**, e42649.

588 Wright B, Morris K, Grueber CE *et al.* (2015) Development of a SNP-based assay for measuring  
 589 genetic diversity in the Tasmanian devil insurance population. *BMC Genomics*, **16**.

590  
 591

592

593 **Table 1.** Number of polymorphic loci present in all individuals ( $n=10$  per species) used for  
 594 analyses of each population (diagonal) and population pair (below diagonal).

|                                  | PBL<br>( <i>C. becki</i> ) | CRU<br>( <i>C. porteri</i> ) | VA<br>( <i>C. vandenburghi</i> ) |
|----------------------------------|----------------------------|------------------------------|----------------------------------|
| PBL<br>( <i>C. becki</i> )       | 9,580                      |                              |                                  |
| CRU<br>( <i>C. porteri</i> )     | 19,654                     | 11,703                       |                                  |
| VA<br>( <i>C. vandenburghi</i> ) | 13,520                     | 16,432                       | 5,732                            |

595  
 596

597 **Table 2.** Pairwise  $F_{ST}$  values between given species pairs. Above the diagonal, values  
 598 calculated using our dataset of SNPs with no missing data and common to the population pair,  
 599 along with 95% confidence intervals. Below the diagonal, values calculated using 12  
 600 microsatellite loci from Garrick et al. (2015) (see supplementary material section VIII). Data  
 601 were obtained using 10 samples for each population (PBL, VA, CRU) for the three species.

|                                  | PBL<br>( <i>C. becki</i> ) | CRU<br>( <i>C. porteri</i> ) | VA<br>( <i>C. vandenburghi</i> ) |
|----------------------------------|----------------------------|------------------------------|----------------------------------|
| PBL<br>( <i>C. becki</i> )       | xx                         | 0.169<br>(0.164 – 0.174)     | 0.181<br>(0.175 – 0.187)         |
| CRU<br>( <i>C. porteri</i> )     | 0.137                      | xx                           | 0.233<br>(0.226 – 0.240)         |
| VA<br>( <i>C. vandenburghi</i> ) | 0.163                      | 0.202                        | xx                               |

602

603

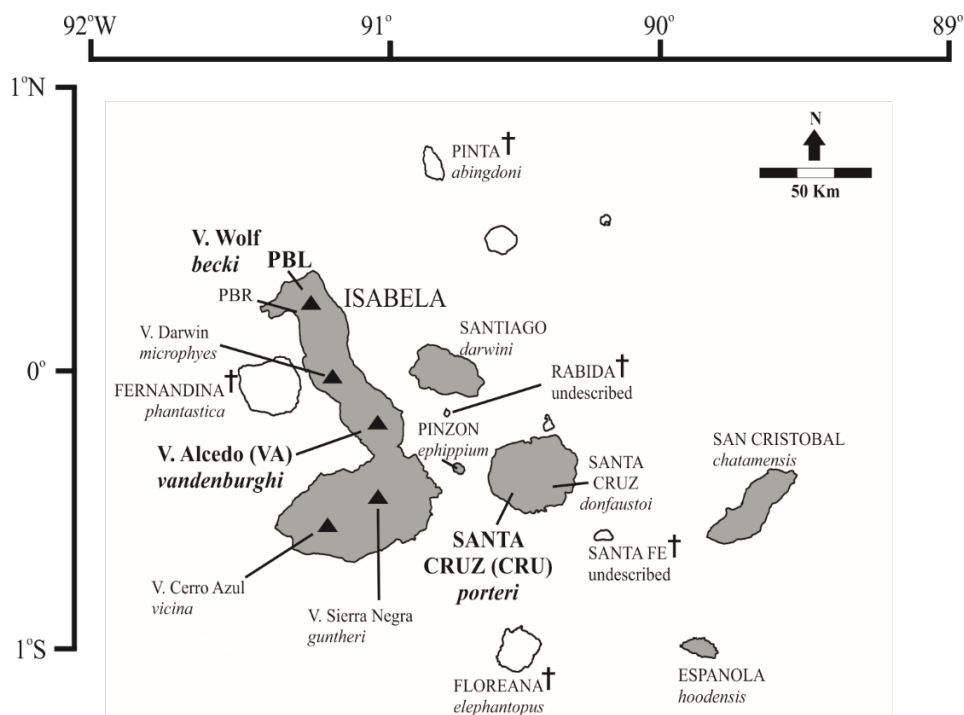

604

605 **Figure 1.**

606

607

608

609

610

611

612

613

614

615 **Figure 1.** Distribution map of Galápagos giant tortoises throughout the archipelago. The  
616 islands with extant species are shown in gray, while the islands with extinct species are  
617 in white. Black triangles identify the location of the four volcanoes on Isabela Island,  
618 each with its own locally endemic tortoise species. Extinct species are identified by a  
619 cross symbol. Names of each species are in cursive with a black line pointing to the  
620 island or location within an island where they occur. The populations from the three  
621 species in this study are identified by two or three letter symbols in bold: CRU = *C.*  
622 *porterii*, Santa Cruz Island (La Caseta). VA = *C. vandenburghi*, Volcano Alcedo, central  
623 Isabela Island, and PBL = *C. becki*, Piedras Blancas, Volcano Wolf, northern Isabela  
624 Island.

625  
626  
627  
628  
629  
630  
631



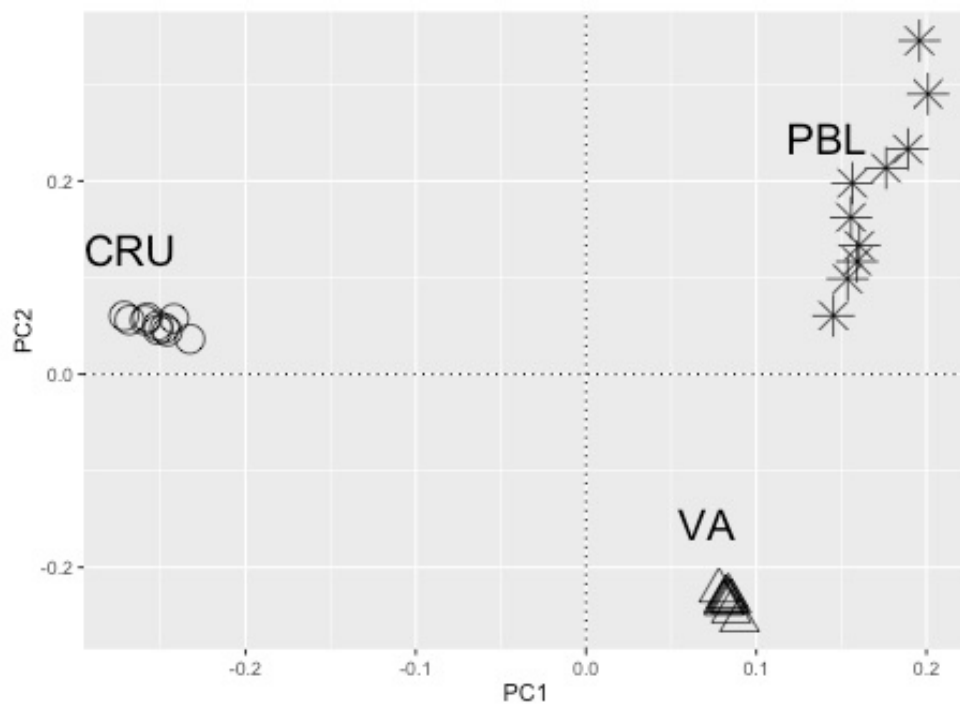

632

633

634 **Figure 2.**

635

636

637

638

639

640

641

642

643

644

645

646 **Figure 2.** Principal component 1 (PC1) plotted against principal component 2 (PC2) for 30  
647 individuals from 3 populations, resulting from PCA analysis on 23,057 SNPs. Stars, open  
648 circles, and open triangles identify individuals from the PBL (*C. becki*), CRU (*C. porteri*),  
649 and VA (*C. vandenburghi*) populations, respectively. The analysis was carried out using  
650 PLINK (Chang *et al.* 2015).

651

652

653

654

655

656

657

658

659

660

661

662

663

664

665

666

667

668

669

670

671

672

673

674

675

676

677 A)

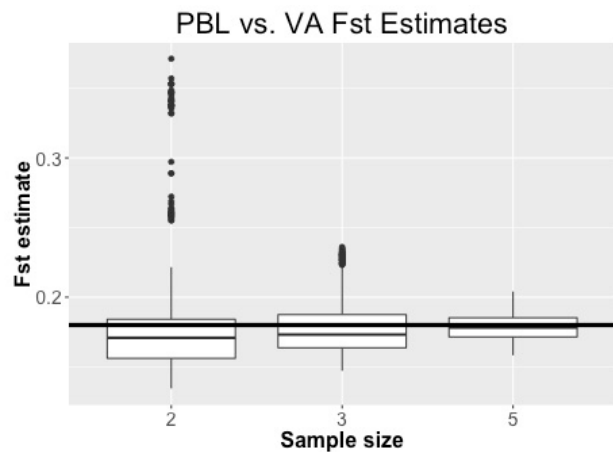

B)

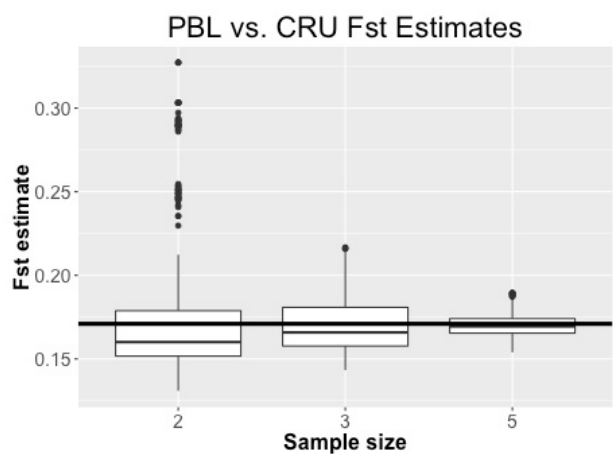

678

679 C)

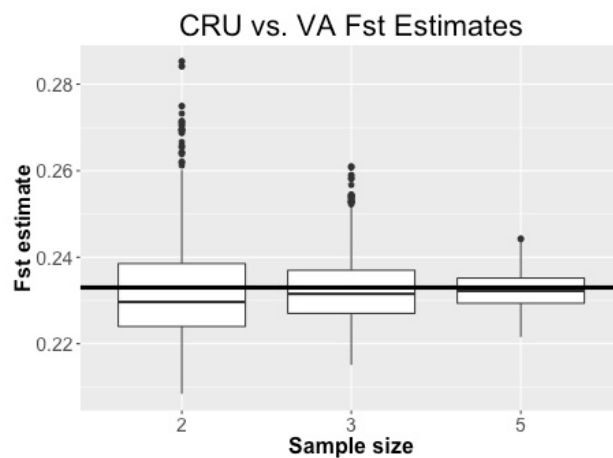

680

681 **Figure 3**

682

683

684

685

686

687

688

689

690 **Figure 3.** Boxplots of pairwise  $F_{ST}$  estimates using 1,000 randomly drawn subsamples of  
691 individuals for each sample size ( $n=2, 3, \text{ or } 5$ ) from each population. PBL, CRU and VA  
692 correspond to population samples from *C. becki*, *C. porteri* and *C. vandenburghi*,  
693 respectively. The horizontal black line in each boxplot marks the  $F_{ST}$  value calculated  
694 using all ten individuals from each population in the pairwise comparison (see  
695 supplementary table S1). Lower hinge corresponds to first quartile (25<sup>th</sup> percentile);  
696 upper hinge corresponds to third quartile (75<sup>th</sup> percentile). Whiskers indicate points  
697 within 1.5 times the interquartile range (IQR), with outliers indicated as points beyond  
698 that range.

699

700

701

702

703

704

705

706

707

708

709

710

711

712

713

714
